# Supplementary material
Source: ML conference proceedings conference paper supplement (https://proceedings.mlr.press/v216/berenbrink23a.html)
Supplement: Supplementary file 1 [file berenbrink23a-supp.pdf]

---

# Inference of a Rumor's Source in the Independent Cascade Model (Supplementary Material)

---

## A OMITTED PROOFS

### A.1 PROOF OF THEOREM 1

Observe that by definition, we have for any  $v, w \in V$  that  $\mathbb{P}(\omega = v) = \mathbb{P}(\omega = w)$ . Thus, by Bayes' rule and the law of total probability we get

$$\begin{aligned} \mathbb{P}(\omega = v \mid \mathbf{X}^* = X) &= \frac{\mathbb{P}(\mathbf{X}^* = X \mid \omega = v)\mathbb{P}(\omega = v)}{\mathbb{P}(\mathbf{X}^* = X)} \\ &= \frac{\mathbb{P}(\mathbf{X}^* = X \mid \omega = v)\mathbb{P}(\omega = v)}{\sum_{\omega \in V} \mathbb{P}(\mathbf{X}^* = X \mid \omega = \omega)\mathbb{P}(\omega = \omega)} = \frac{\mathbb{P}(\mathbf{X}^* = X \mid \omega = v)}{\sum_{\omega \in V} \mathbb{P}(\mathbf{X}^* = X \mid \omega = \omega)}. \end{aligned}$$

As  $\sum_{\omega \in V} \mathbb{P}(\mathbf{X}^* = X \mid \omega = \omega)$  is independent from  $v$ , we have

$$\arg \max_{v \in V} \mathbb{P}(\omega = v \mid \mathbf{X}^* = X) = \arg \max_{v \in V} \mathbb{P}(\mathbf{X}^* = X \mid \omega = v)$$

and the theorem follows. □

### A.2 PROOF OF PROPOSITION 8

*Proof.* The recurrence  $\bar{x}_t = \exp(-\lambda p(1 - \bar{x}_{t-1}))$  can be easily calculated by the probability generating function of the Poisson distribution. Indeed, let  $f_{\text{Po}(\lambda)}(s) = \mathbb{E}[s^{\text{Po}(\lambda)}]$  be the probability generating function of the Poisson distribution. It is well known that

$$f_{\text{Po}(\lambda)}(s) = \exp(-\lambda(1 - s)).$$

We refer to [Grimmett and Stirzaker, 2020] for a detailed explanation of the connection between the probability generating function and the extinction probability of branching processes.

Now, for brevity, suppose that  $v = \omega_c$ . Let  $\mathcal{V}_0$  be the event that  $v$  has exactly  $k \leq \mathbf{d}_0 \leq d$  children that get activated by  $v$ . Similarly as before,  $\mathbb{P}(\mathcal{V}_0) = \mathbb{P}(\text{Po}(\lambda p) = \mathbf{d}_0)$  and of course,  $\mathbf{d}_0$  needs to be at least  $k$  as differently, the probability of having  $k$  active sub-trees was zero.

Given  $\mathcal{V}_0$ , we again start  $\mathbf{d}_0$  independent Galton-Watson processes with offspring distribution  $\text{Po}(\lambda p)$  in the children. Therefore, the probability of observing exactly  $k$  active sub-trees is the probability that exactly  $k$  out of  $\mathbf{d}_0$  of those processes are not extinct after  $t_v^{\mathbf{X}^*}$  steps. Of course, the number of such active sub-trees at time  $t$  is distributed as  $\text{Bin}(\mathbf{d}_0, \bar{x}_t)$  given  $\mathcal{V}_0$  and the first part of the formula follows.

As in the  $d$ -regular case, if on contrary  $v$  is not the closest candidate but a node further apart from  $\mathbf{X}^*$ , we observe that from the originally  $1 \leq \mathbf{d}_0 \leq d$  Galton-Watson processes originated in the children of  $v$ , exactly one process needed to survive and  $\mathbf{d}_0 - 1$  needed to be extinct at time  $t_v^{\mathbf{X}^*}$ . □

### A.3 PROOF OF THEOREM 3 (I)

*Proof of Theorem 3 (i).* As in the  $d$ -regular case, the first part of Theorem 3 follows by the first part of Proposition 8. If  $\lambda p \leq 1$ , the smallest fixed-point of  $\bar{x} \mapsto \exp(-\lambda p(1 - \bar{x}))$  is  $\bar{x} = 1$ . Therefore,  $\bar{x}_t = 1 - o_t(1)$  describes the probability that the underlying spreading process died out until time-step  $t$ . More precisely, by the recurrence equation, we find the following. Suppose that  $\varepsilon_t = o_t(1)$  denotes the convergence speed towards 1. Then, by the recurrence equation and a Taylor approximation we have

$$1 - \varepsilon_t = 1 - \lambda p \left( \varepsilon_{t-1} + \frac{\lambda^2 p^2 \varepsilon_{t-1}^2}{2} \right) + O(\varepsilon_{t-1}^3).$$

If  $\lambda p < 1$ , we directly find that  $\varepsilon_t = O((\lambda p)^t)$  decays exponentially fast in  $t$ . If  $\lambda p = 1$ , this is much more subtle. Indeed, we find

$$\varepsilon_t \leq \left( \varepsilon_{t-1} - \frac{\varepsilon_{t-1}^2}{2} \right) + O(\varepsilon_{t-1}^3)$$

and therefore, we only get  $\varepsilon_t = O(t^{-1})$  in this case.

Since we assume  $p$  to be a constant, clearly  $\lambda = O(1)$  as well. Unfortunately, the Poisson tails are kind of heavy. More precisely, even if  $\lambda$  is a constant, the probability that a  $\text{Po}(\lambda)$  variable becomes large is not negligible. We analyze this by a careful application of limits. Recall that we assume that the underlying tree-network is infinite. We model this as follows. Suppose that the tree-network consists of  $n$  vertices and we will let  $n \rightarrow \infty$ .

Let  $C > 0$ , then the probability that the number of neighbors of a specific node  $v$  exceeds  $C$  is, for large  $C$ , given by Chernoff bounds as

$$\mathbb{P}(|\partial v| > C) \leq \exp\left(-\frac{(C - \lambda)^2}{2C}\right) \sim \exp(-C/2).$$

As the number of spawned children is independent for all vertices, the number of vertices of degree at least  $C$  is stochastically dominated by  $\text{Bin}(n, \exp(-C/2))$ . Thus, with probability  $1 - o_n(1)$ , there are no more than  $O(n\sqrt{\ln(n)}\exp(-D))$  vertices of degree  $D > 0$  for a sufficiently large constant  $D$  (independent of  $n$ ) if  $n \rightarrow \infty$ .

We denote by  $\mathcal{D}$  the event that this is actually true. Thus, conditioned on  $\mathcal{D}$ , there are only  $O(n\sqrt{\ln(n)}\exp(-D))$  vertices of degree at least  $D$ . Now, we chose  $\omega$  uniformly at random out of all vertices. Therefore, given  $\mathcal{D}$ , the probability that  $\omega$  has small degree is

$$\mathbb{P}(|\partial \omega| > D \mid \mathcal{D}) = 1 - O\left(\frac{\sqrt{\ln(n)}}{\exp(-D)}\right).$$

Clearly, this becomes only a high probability event if  $D = \Omega(\ln \ln n)$ . In the worst case, we find that a union bound over all activated children of  $\omega$  leads only to ultimate extinction of all processes, if  $O\left(\frac{\ln \ln n}{t}\right) = o_t(1)$ , or, differently, that  $t = \omega(\ln \ln n)$ . As in the theorem, we only claim the assertion in the limit  $t \rightarrow \infty$  and we assume the underlying tree-network to be infinite. This proves the claim of the theorem. We remark at this point that the assumption that  $t$  depends slightly on  $n$  does no harm to applications as, on real networks,  $\ln \ln n$  can be seen as a constant.  $\square$

## B SIMULATION DATA

### References

Geoffrey Grimmett and David Stirzaker. *Probability and Random Processes*. Oxford University Press, New York, 4 edition, 2020. ISBN 978-0-198-84760-1.

Table 1: Simulation results for random geometric graphs.

| $p$  | number of successes | $\omega_c \neq \omega$ | $\mathbf{X}^* = \emptyset$ | average distance | maximum distance |
|------|---------------------|------------------------|----------------------------|------------------|------------------|
| 0.00 | 0                   | 0                      | 100                        |                  | 0                |
| 0.05 | 1                   | 1                      | 98                         | 2.25             | 4                |
| 0.10 | 5                   | 29                     | 66                         | 2.39             | 5                |
| 0.15 | 25                  | 59                     | 16                         | 2.02             | 6                |
| 0.20 | 34                  | 63                     | 3                          | 1.68             | 5                |
| 0.25 | 51                  | 48                     | 1                          | 1.51             | 4                |
| 0.30 | 62                  | 36                     | 2                          | 1.40             | 5                |
| 0.35 | 71                  | 29                     | 0                          | 1.24             | 5                |
| 0.40 | 86                  | 14                     | 0                          | 1.11             | 4                |
| 0.45 | 94                  | 6                      | 0                          | 1.04             | 3                |
| 0.50 | 94                  | 6                      | 0                          | 1.13             | 5                |
| 0.55 | 95                  | 5                      | 0                          | 1.07             | 5                |
| 0.60 | 100                 | 0                      | 0                          | 0.97             | 4                |
| 0.65 | 95                  | 5                      | 0                          | 1.03             | 6                |
| 0.70 | 99                  | 1                      | 0                          | 0.79             | 3                |
| 0.75 | 99                  | 1                      | 0                          | 1.03             | 5                |
| 0.80 | 100                 | 0                      | 0                          | 0.97             | 5                |
| 0.85 | 100                 | 0                      | 0                          | 0.96             | 6                |
| 0.90 | 100                 | 0                      | 0                          | 0.66             | 3                |
| 0.95 | 98                  | 2                      | 0                          | 0.87             | 5                |
| 1.00 | 100                 | 0                      | 0                          | 0.85             | 6                |

Table 2: Simulation results for Erdős-Rényi graphs.

| $p$  | number of successes | $\omega_c \neq \omega$ | $\mathbf{X}^* = \emptyset$ | average distance | maximum distance |
|------|---------------------|------------------------|----------------------------|------------------|------------------|
| 0.00 | 0                   | 0                      | 100                        | -                | -                |
| 0.05 | 0                   | 0                      | 100                        | -                | -                |
| 0.10 | 0                   | 0                      | 100                        | -                | -                |
| 0.15 | 0                   | 1                      | 99                         | 6.00             | 6                |
| 0.20 | 0                   | 6                      | 94                         | 7.50             | 9                |
| 0.25 | 0                   | 14                     | 86                         | 6.63             | 8                |
| 0.30 | 2                   | 30                     | 68                         | 7.34             | 10               |
| 0.35 | 11                  | 35                     | 54                         | 7.23             | 10               |
| 0.40 | 21                  | 49                     | 30                         | 5.87             | 9                |
| 0.45 | 33                  | 43                     | 24                         | 6.14             | 9                |
| 0.50 | 42                  | 33                     | 25                         | 1.15             | 8                |
| 0.55 | 54                  | 31                     | 15                         | 0.54             | 3                |
| 0.60 | 63                  | 24                     | 13                         | 0.36             | 3                |
| 0.65 | 74                  | 19                     | 7                          | 0.30             | 2                |
| 0.70 | 78                  | 17                     | 5                          | 0.21             | 2                |
| 0.75 | 78                  | 15                     | 7                          | 0.17             | 2                |
| 0.80 | 82                  | 12                     | 6                          | 0.18             | 3                |
| 0.85 | 81                  | 15                     | 4                          | 0.17             | 2                |
| 0.90 | 86                  | 13                     | 1                          | 0.17             | 2                |
| 0.95 | 85                  | 10                     | 5                          | 0.10             | 1                |
| 1.00 | 92                  | 5                      | 3                          | 0.05             | 1                |

Table 3: Simulation results for random regular graphs (configuration model).

| $p$  | number of successes | $\omega_c \neq \omega$ | $\mathbf{X}^* = \emptyset$ | average distance | maximum distance |
|------|---------------------|------------------------|----------------------------|------------------|------------------|
| 0.00 | 0                   | 0                      | 100                        | -                | -                |
| 0.05 | 0                   | 0                      | 100                        | -                | -                |
| 0.10 | 0                   | 0                      | 100                        | -                | -                |
| 0.15 | 0                   | 0                      | 100                        | -                | -                |
| 0.20 | 0                   | 0                      | 100                        | -                | -                |
| 0.25 | 0                   | 5                      | 95                         | 7.20             | 9                |
| 0.30 | 0                   | 16                     | 84                         | 7.53             | 11               |
| 0.35 | 2                   | 26                     | 72                         | 6.86             | 12               |
| 0.40 | 19                  | 43                     | 38                         | 5.37             | 11               |
| 0.45 | 38                  | 40                     | 22                         | 2.70             | 11               |
| 0.50 | 43                  | 41                     | 16                         | 2.06             | 9                |
| 0.55 | 70                  | 23                     | 7                          | 0.57             | 6                |
| 0.60 | 76                  | 21                     | 3                          | 0.34             | 4                |
| 0.65 | 86                  | 11                     | 3                          | 0.15             | 3                |
| 0.70 | 87                  | 10                     | 3                          | 0.14             | 3                |
| 0.75 | 98                  | 2                      | 0                          | 0.02             | 1                |
| 0.80 | 97                  | 3                      | 0                          | 0.03             | 1                |
| 0.85 | 99                  | 1                      | 0                          | 0.01             | 1                |
| 0.90 | 100                 | 0                      | 0                          | 0                | 0                |
| 0.95 | 100                 | 0                      | 0                          | 0                | 0                |
| 1.00 | 100                 | 0                      | 0                          | 0                | 0                |
